# Supplementary material for: Polarized microtubule remodeling transforms the morphology of reactive microglia and drives cytokine release
Source: PubMed Central journal article supplement (PMC10562429; doi:10.1038/s41467-023-41891-6), 2023-10-09
Supplement: 41467_2023_41891_MOESM1_ESM.pdf [file 41467_2023_41891_MOESM1_ESM.pdf]

# **Polarized microtubule remodeling transforms the morphology of reactive microglia and drives cytokine release**

## **Supplementary Information**

Max Adrian<sup>1,2</sup>, Martin Weber<sup>1</sup>, Ming-Chi Tsai<sup>1</sup>, Caspar Glock<sup>3</sup>, Olga I. Kahn<sup>1</sup>, Lilian Phu<sup>4</sup>, Tommy K. Cheung<sup>4</sup>, William J. Meilandt<sup>1</sup>, Christopher M. Rose<sup>4</sup>, Casper C. Hoogenraad<sup>1, 5, \*</sup>

<sup>1</sup> Department of Neuroscience, Genentech, Inc., South San Francisco, CA 94080, USA

<sup>2</sup> Department of Pathology, Genentech, Inc., South San Francisco, CA 94080, USA

<sup>3</sup> Department of OMNI Bioinformatics, Genentech Inc., South San Francisco, CA 94080, USA

<sup>4</sup> Department of Microchemistry, Proteomics and Lipidomics, South San Francisco, CA 94080, USA

<sup>5</sup> Lead contact

\* Correspondence to:

Casper C. Hoogenraad, Department of Neuroscience, Genentech, Inc., 1 DNA Way, South San Francisco, CA 94080, [hoogenraad.casper@gene.com](mailto:hoogenraad.casper@gene.com)

Supplementary Figures 1-5

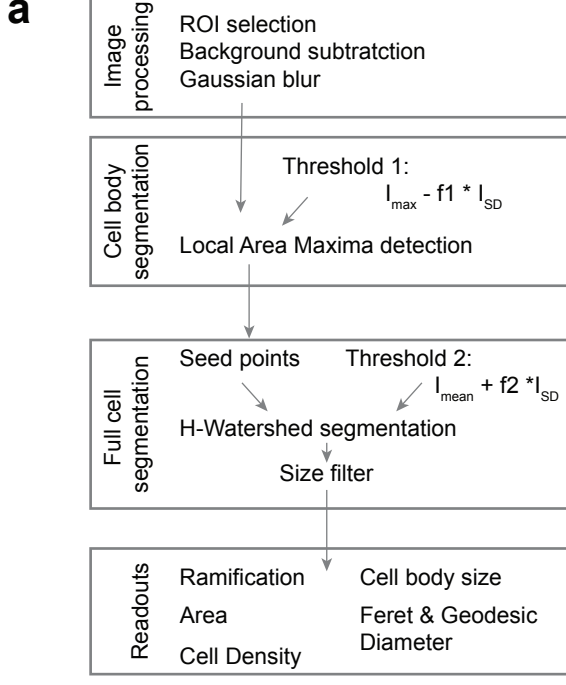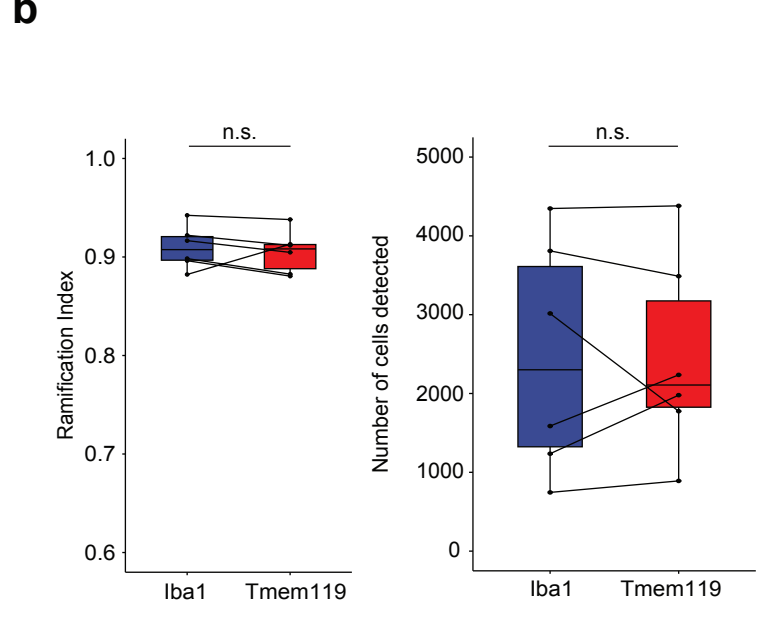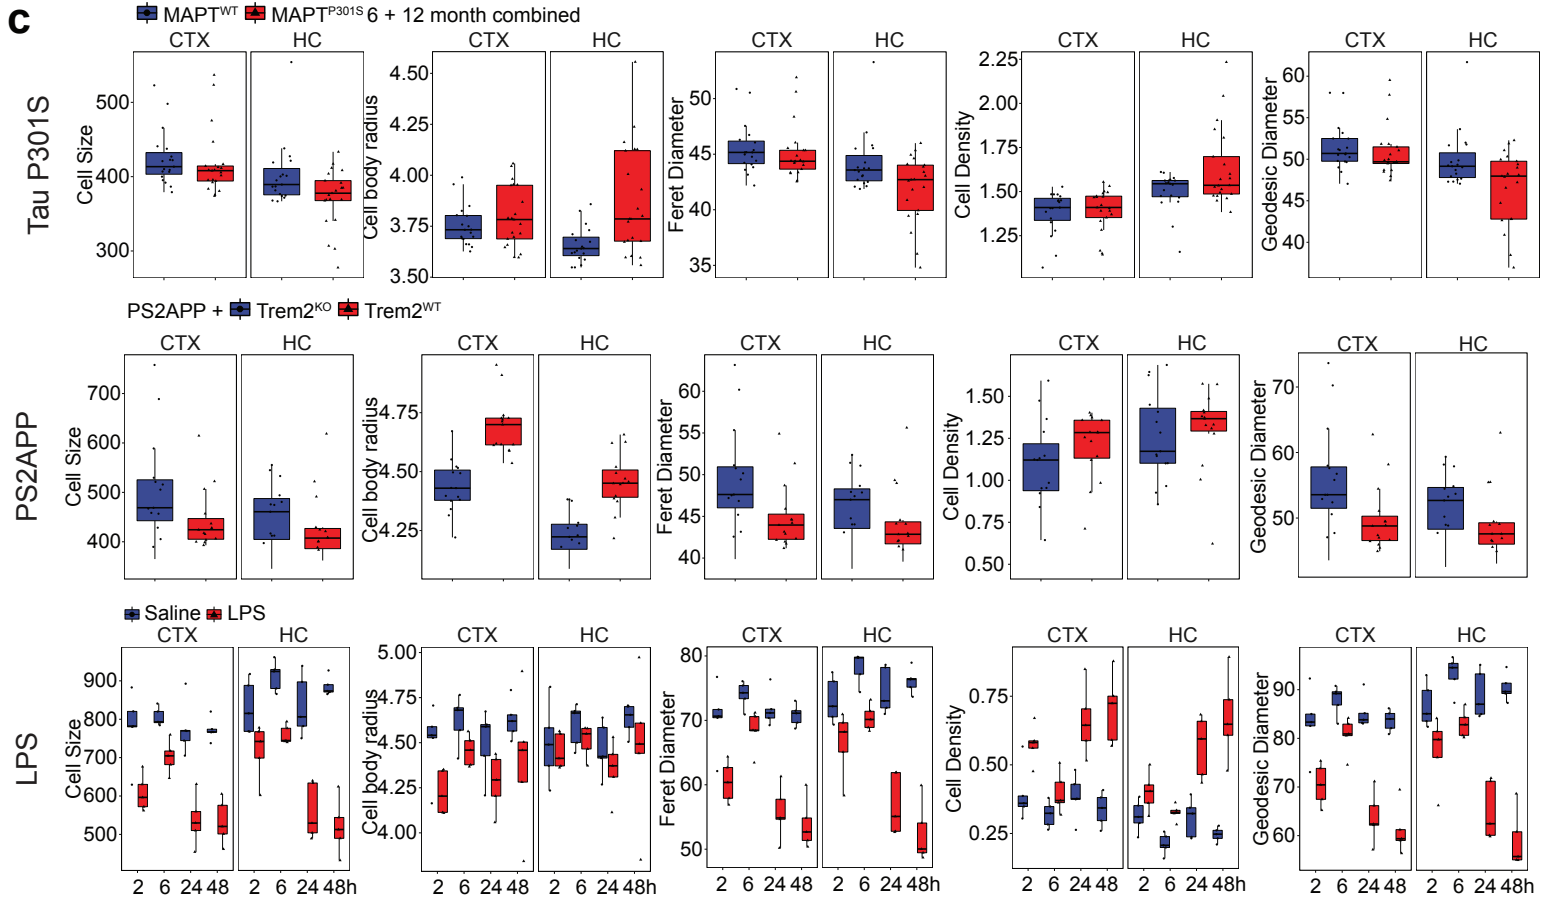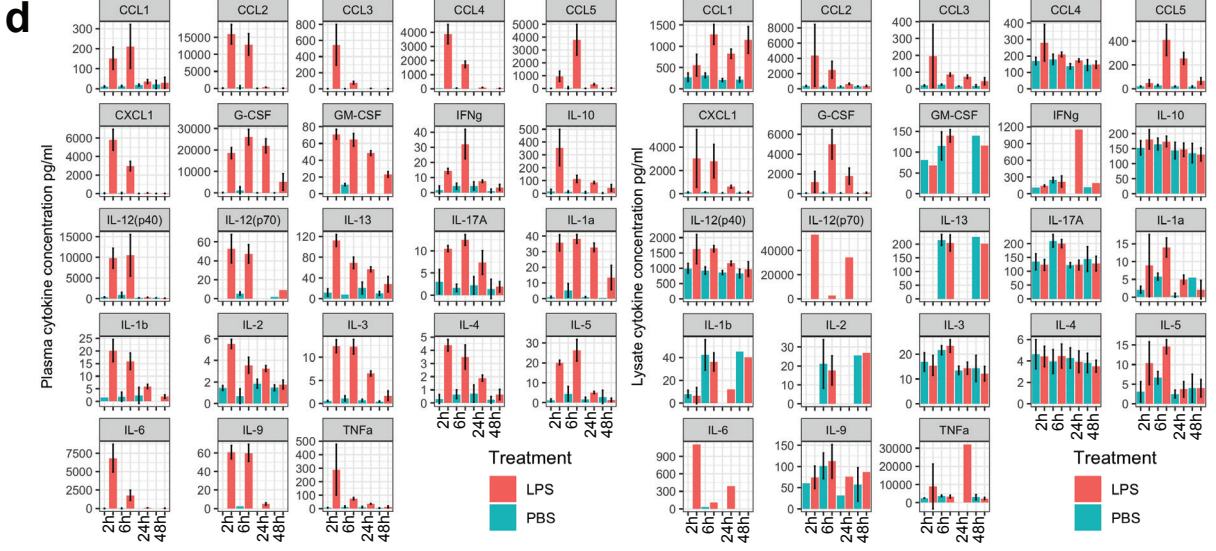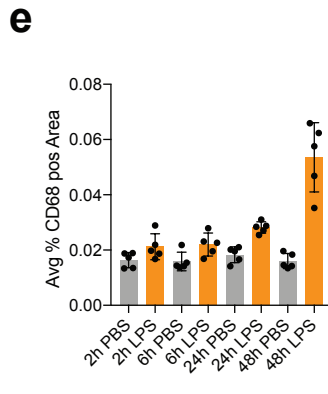

### **Supplementary Figure 1 Extended characterization of microglial morphology *in-situ***

- a) Stepwise workflow of single cell segmentation shown in Figure 1a.
- b) Comparison of single cell segmentation results from microglia staining with Iba1 and Tmem119 antibodies of adjacent tissues slices. Datapoints are averages per animal linked by animal. n = 6 animals.
- c) Additional morphological descriptors for microglia in neurodegenerative models shown in Figure 1. All datapoints are averaged values per animal.
- d) Quantification of cytokines in blood plasma and cerebellar lysate of mice injected *i.p.* with LPS or vehicle at timepoints indicated. Bars indicate mean  $\pm$  SD. Measurements out of detection range are indicated by n.d. n = 3 replicates.
- e) Quantification of CD68 signal in hemibrain in mice injected *i.p.* with LPS or vehicle at timepoints indicated. Bars indicate mean  $\pm$  SE, n = 5 animals per group.

Statistical significance was calculated paired, two-sided t-tests in b. Boxplots show all datapoints, median, 25<sup>th</sup> and 75<sup>th</sup> percentile, whiskers are 1.5\*IQR. Source data are provided as a Source Data file.

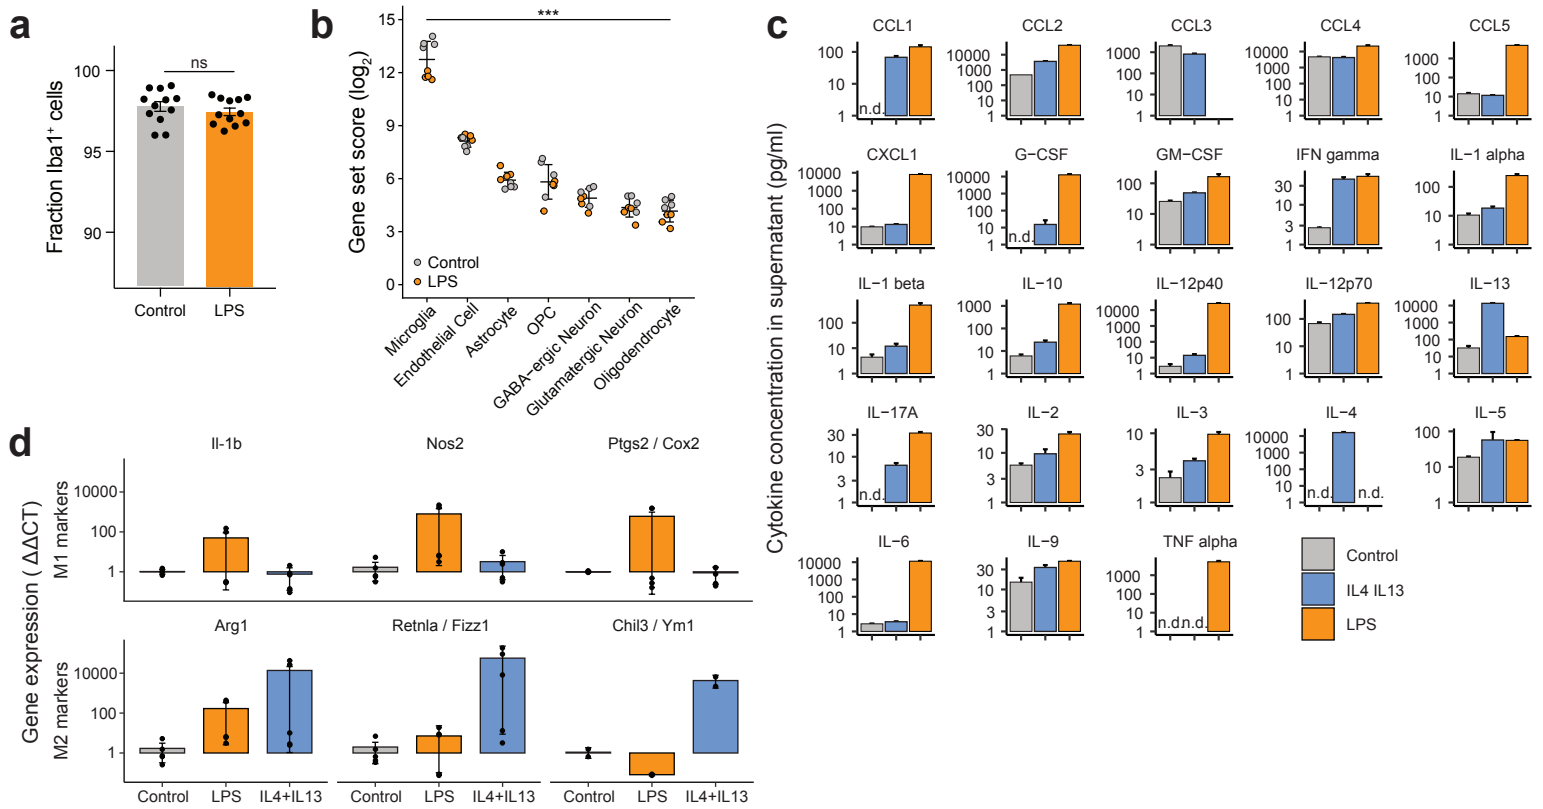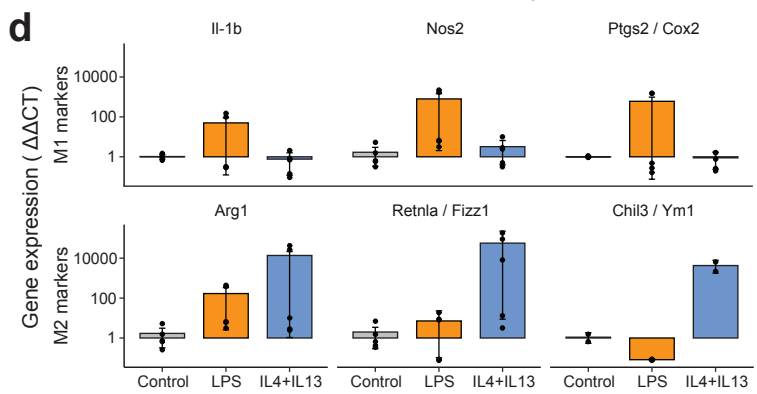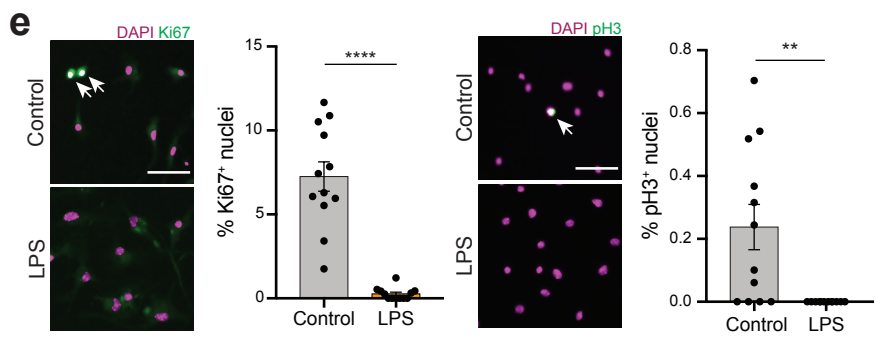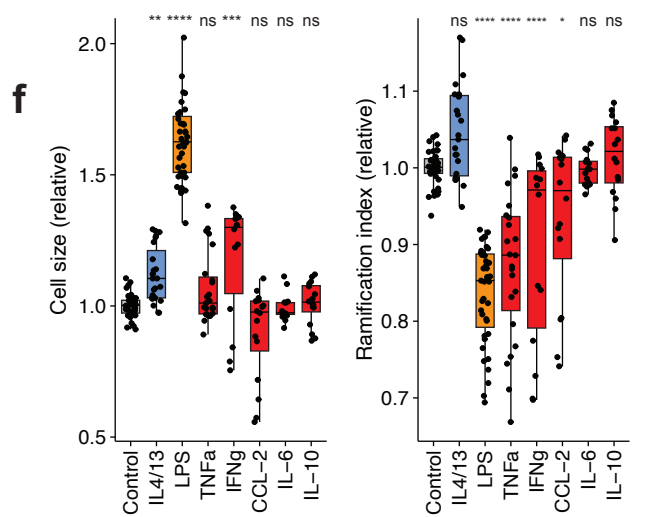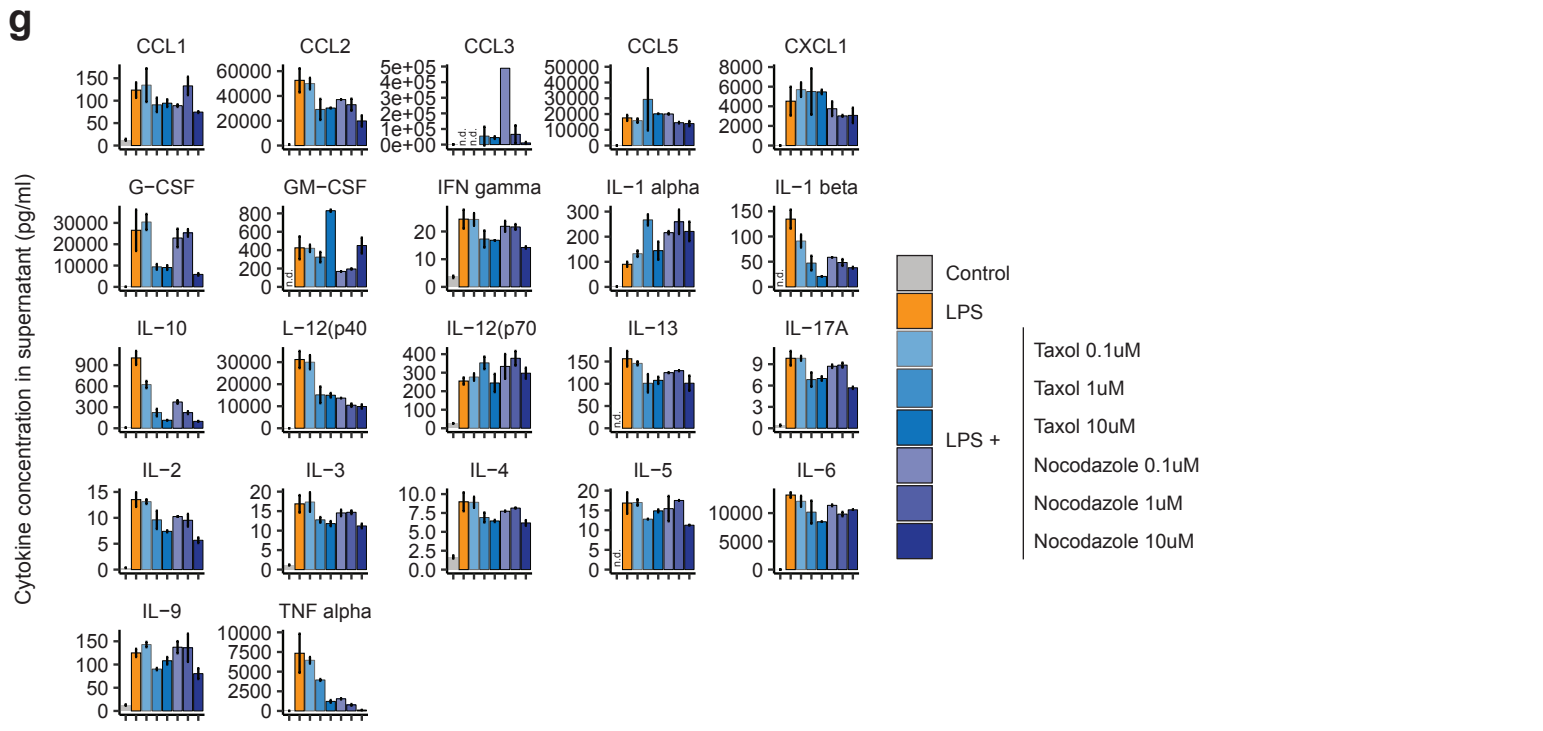

**Supplementary Figure 2 Microglial polarization *in-vitro* and response to microtubule poisons.**

- a) Quantification of fraction of Iba-1 positive cells in primary microglial cultures after shake-off, n = 12 regions from 2 independent cultures.
- b) Gene set score analysis of bulk RNA sequencing of primary microglia and microglia treated with LPS for 24h. n = 4 independent cultures each.
- c) Quantification of cytokines secreted into the supernatant of microglial cultures over 24 h after treatment with LPS or IL4 & IL13. Measurements out of detection range are indicated by n.d. n = 3 replicates.
- d) Quantification of pro- and anti-inflammatory marker gene expression in microglia treated with LPS or IL-4 & IL-13 for 24 h. Bars indicate mean  $\pm$  SE of n = 6 measurements from 2 independent cultures.
- e) Immunostaining and quantification of Ki-67 and phosphorylated Histone H3-positive cells in microglia treated with LPS, n = 12 regions from 2 independent cultures.
- f) Quantification of cell size and ramification index of microglia treated with LPS and indicated cytokines for 24 h relative to control cells. n = 16-39 wells wells from 6 independent cultures.
- g) Quantification of cytokines secreted into the supernatant of microglial cultures over 24 h after treatment with LPS and Taxol or Nocodazole at indicated concentrations. Measurements out of detection range are indicated by n.d. n = 3 replicates.

Scale bars are 50 $\mu$ m in e. Statistical significance was calculated with paired, two-sided t-tests in a, e, Kruskal-Wallis and pairwise Wilcox test in b and ANOVA with Tukey HSD in f. Boxplots show all datapoints, median, 25<sup>th</sup> and 75<sup>th</sup> percentile, whiskers are 1.5\*IQR. Source data are provided as a Source Data file.

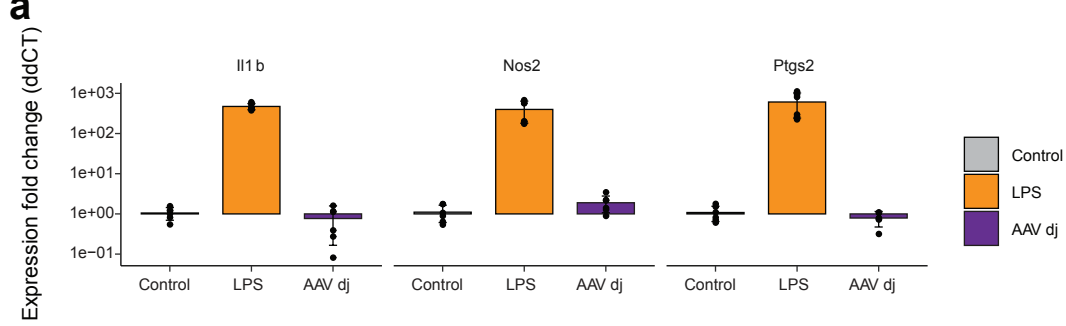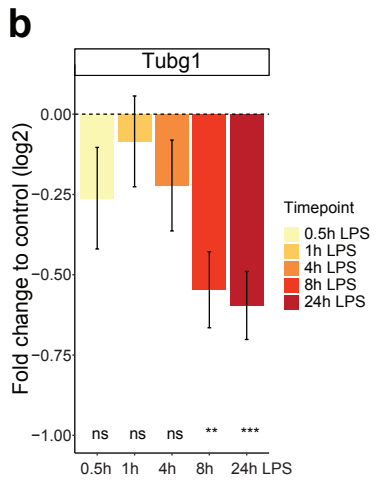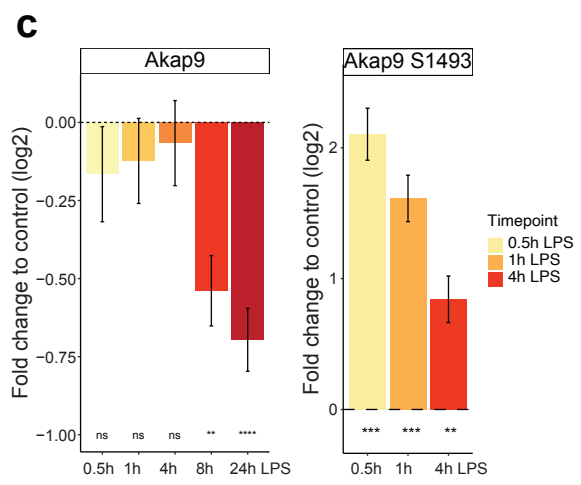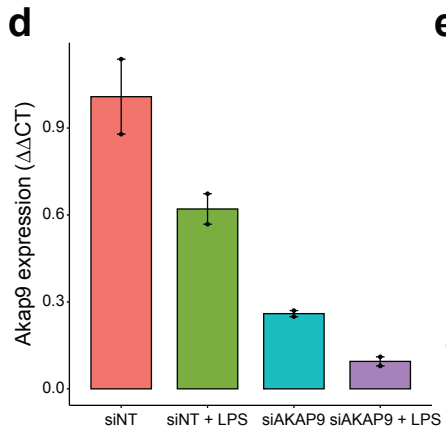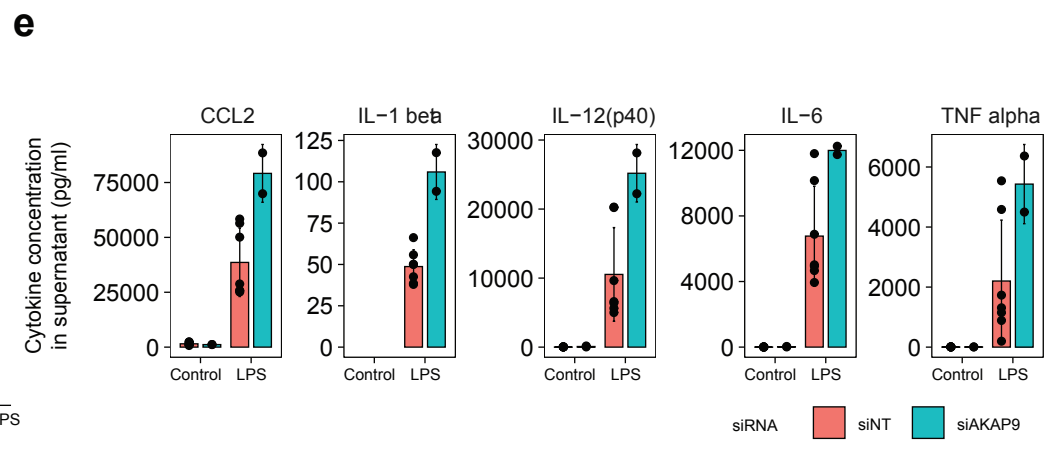

### **Supplementary Figure 3 Extended analysis of microtubule organizing proteins**

- a) Quantification of inflammatory marker gene expression in microglia treated with AAV to induce protein expression. Bars indicate mean  $\pm$  SE of n = 3-5 measurements.
- b) Quantification of fold changes in protein expression of Tubg1 after LPS treatment compared to control cells as determined by quantitative mass spectrometry.
- c) Left: Quantification of fold changes in protein expression of Akap9 after LPS treatment compared to control cells as determined by quantitative mass spectrometry. Right: Quantification of fold changes in Akap9 S1493 phosphorylation after LPS treatment compared to control cells.
- d) Quantification of Akap9 expression by qPCR in microglia treated with LPS, siAkap9 or combination of both compared to control cells, n = 2 replicates.
- e) Quantification of cytokines secreted into the supernatant of microglial cultures over 24 h after treatment with siNT, siAkap9 and/or LPS. Measurements out of detection range are indicated by n.d. n = 2-5 replicates.

Bars indicate mean  $\pm$  SE in a, c, d, e and mean  $\pm$  SD in b. Statistical significance was calculated with ANOVA and Tukey HSD in b, c. Source data are provided as a Source Data file.

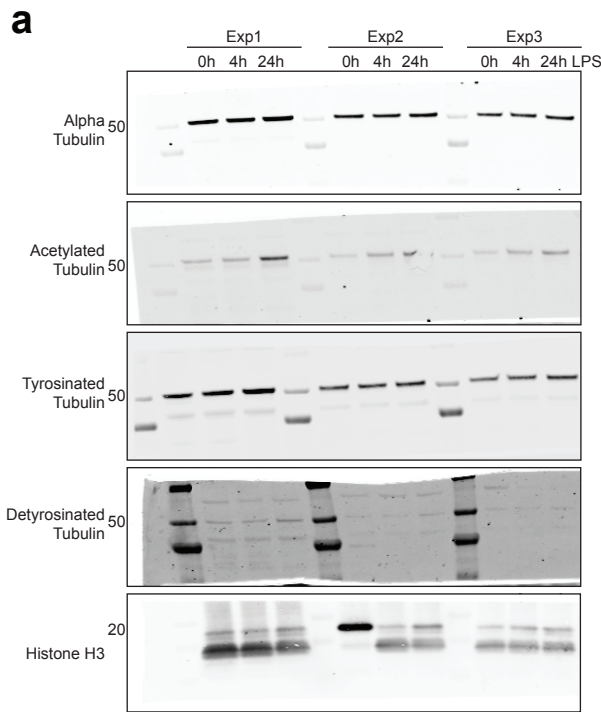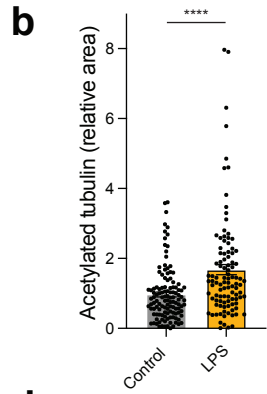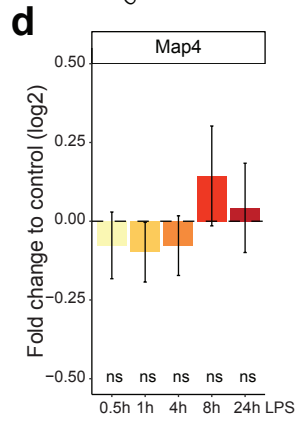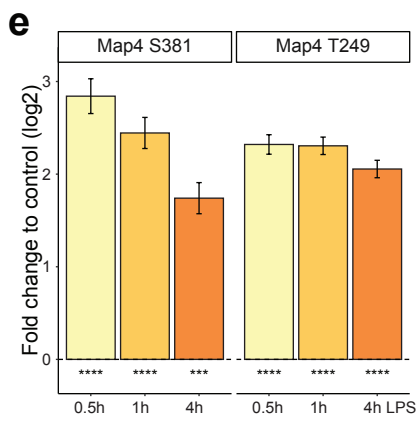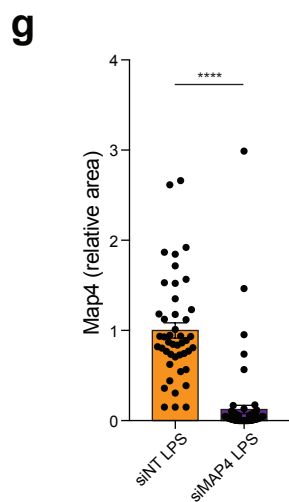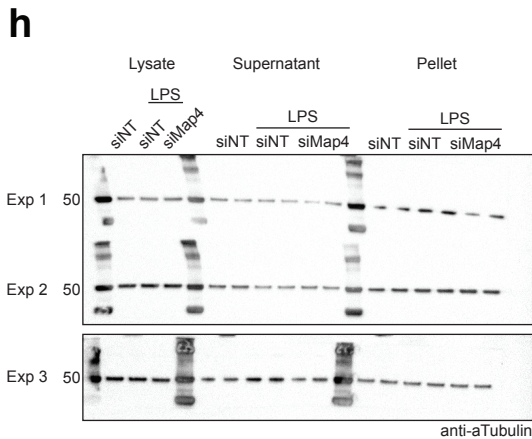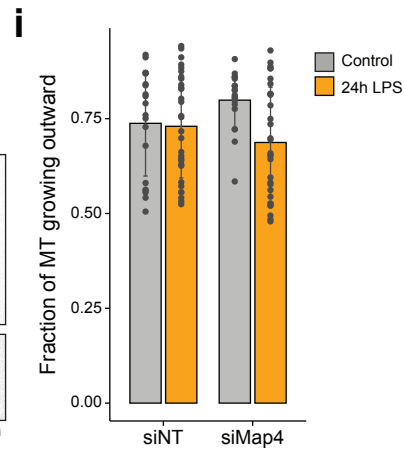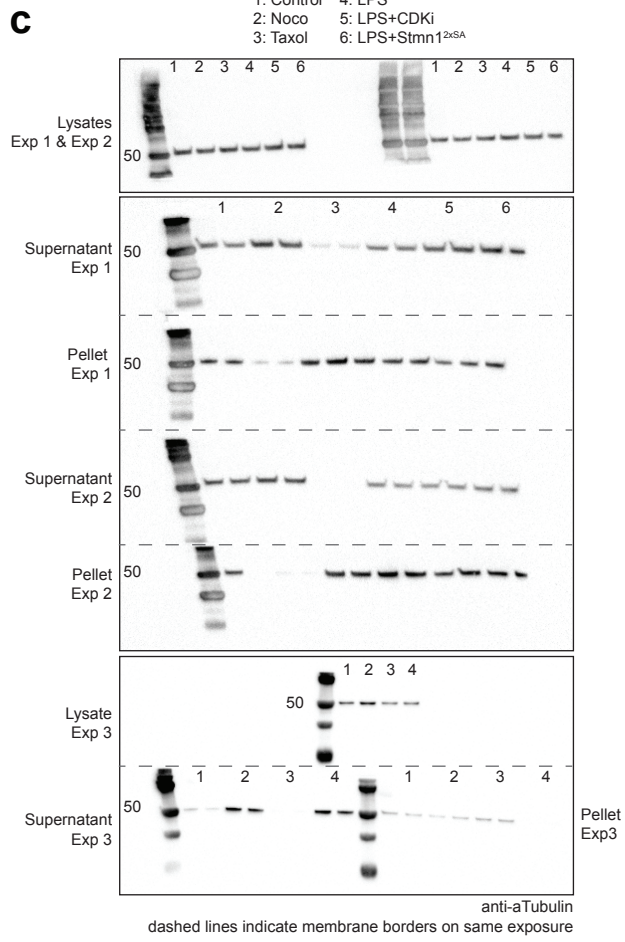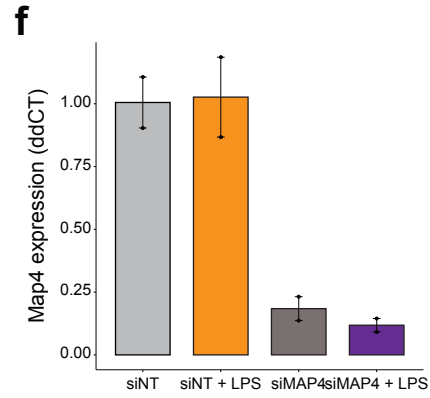



#### **Supplementary Figure 4 Extended analysis of Stmn1 and Map4 pathways**

- a) Full immunoblot panels for microtubule PTM analysis in Figure 3a. Membranes were imaged with Licor Oddysey.
- b) Quantification of acetylated tubulin fluorescent signal in Figure 5b. n = 102-120 cells from 4 independent cultures.
- c) Full immunoblot panels for microtubule polymerization spin-down assay in Figure 3e. Membranes were imaged with ECL on Biorad Geldoc.
- d) Quantification of fold changes in protein levels of Map4 after LPS treatment as determined by quantitative mass spectrometry.
- e) Quantification of fold changes in phosphorylation of Map4 S381 and T249, both located in the uncharacterized N-terminus of Map4, after LPS treatment compared to control cells as determined by quantitative mass spectrometry.
- f) Quantification of fold changes in expression of Map4 after treatment with LPS and siMap4.
- g) Quantification of Map4 fluorescent signal in microglia treated with LPS and siMap4, n = 45-76 cells from 2 independent cultures.
- h) Quantification of MT+TIP growth direction for microglia treated with siMap4 and LPS as indicated. n = 25-31 cells per group from 4 independent cultures
- i) Full immunoblot panels for microtubule polymerization spin-down assay in Figure 3j. Membranes were imaged with ECL on Biorad Geldoc.

Bars indicate mean  $\pm$  SE in d, e, f and mean  $\pm$  SD in b, g, h. Statistical significance was calculated with ANOVA and Tukey HSD in d, e, h and unpaired, two-sided t-tests in b, g. Source data are provided as a Source Data file.

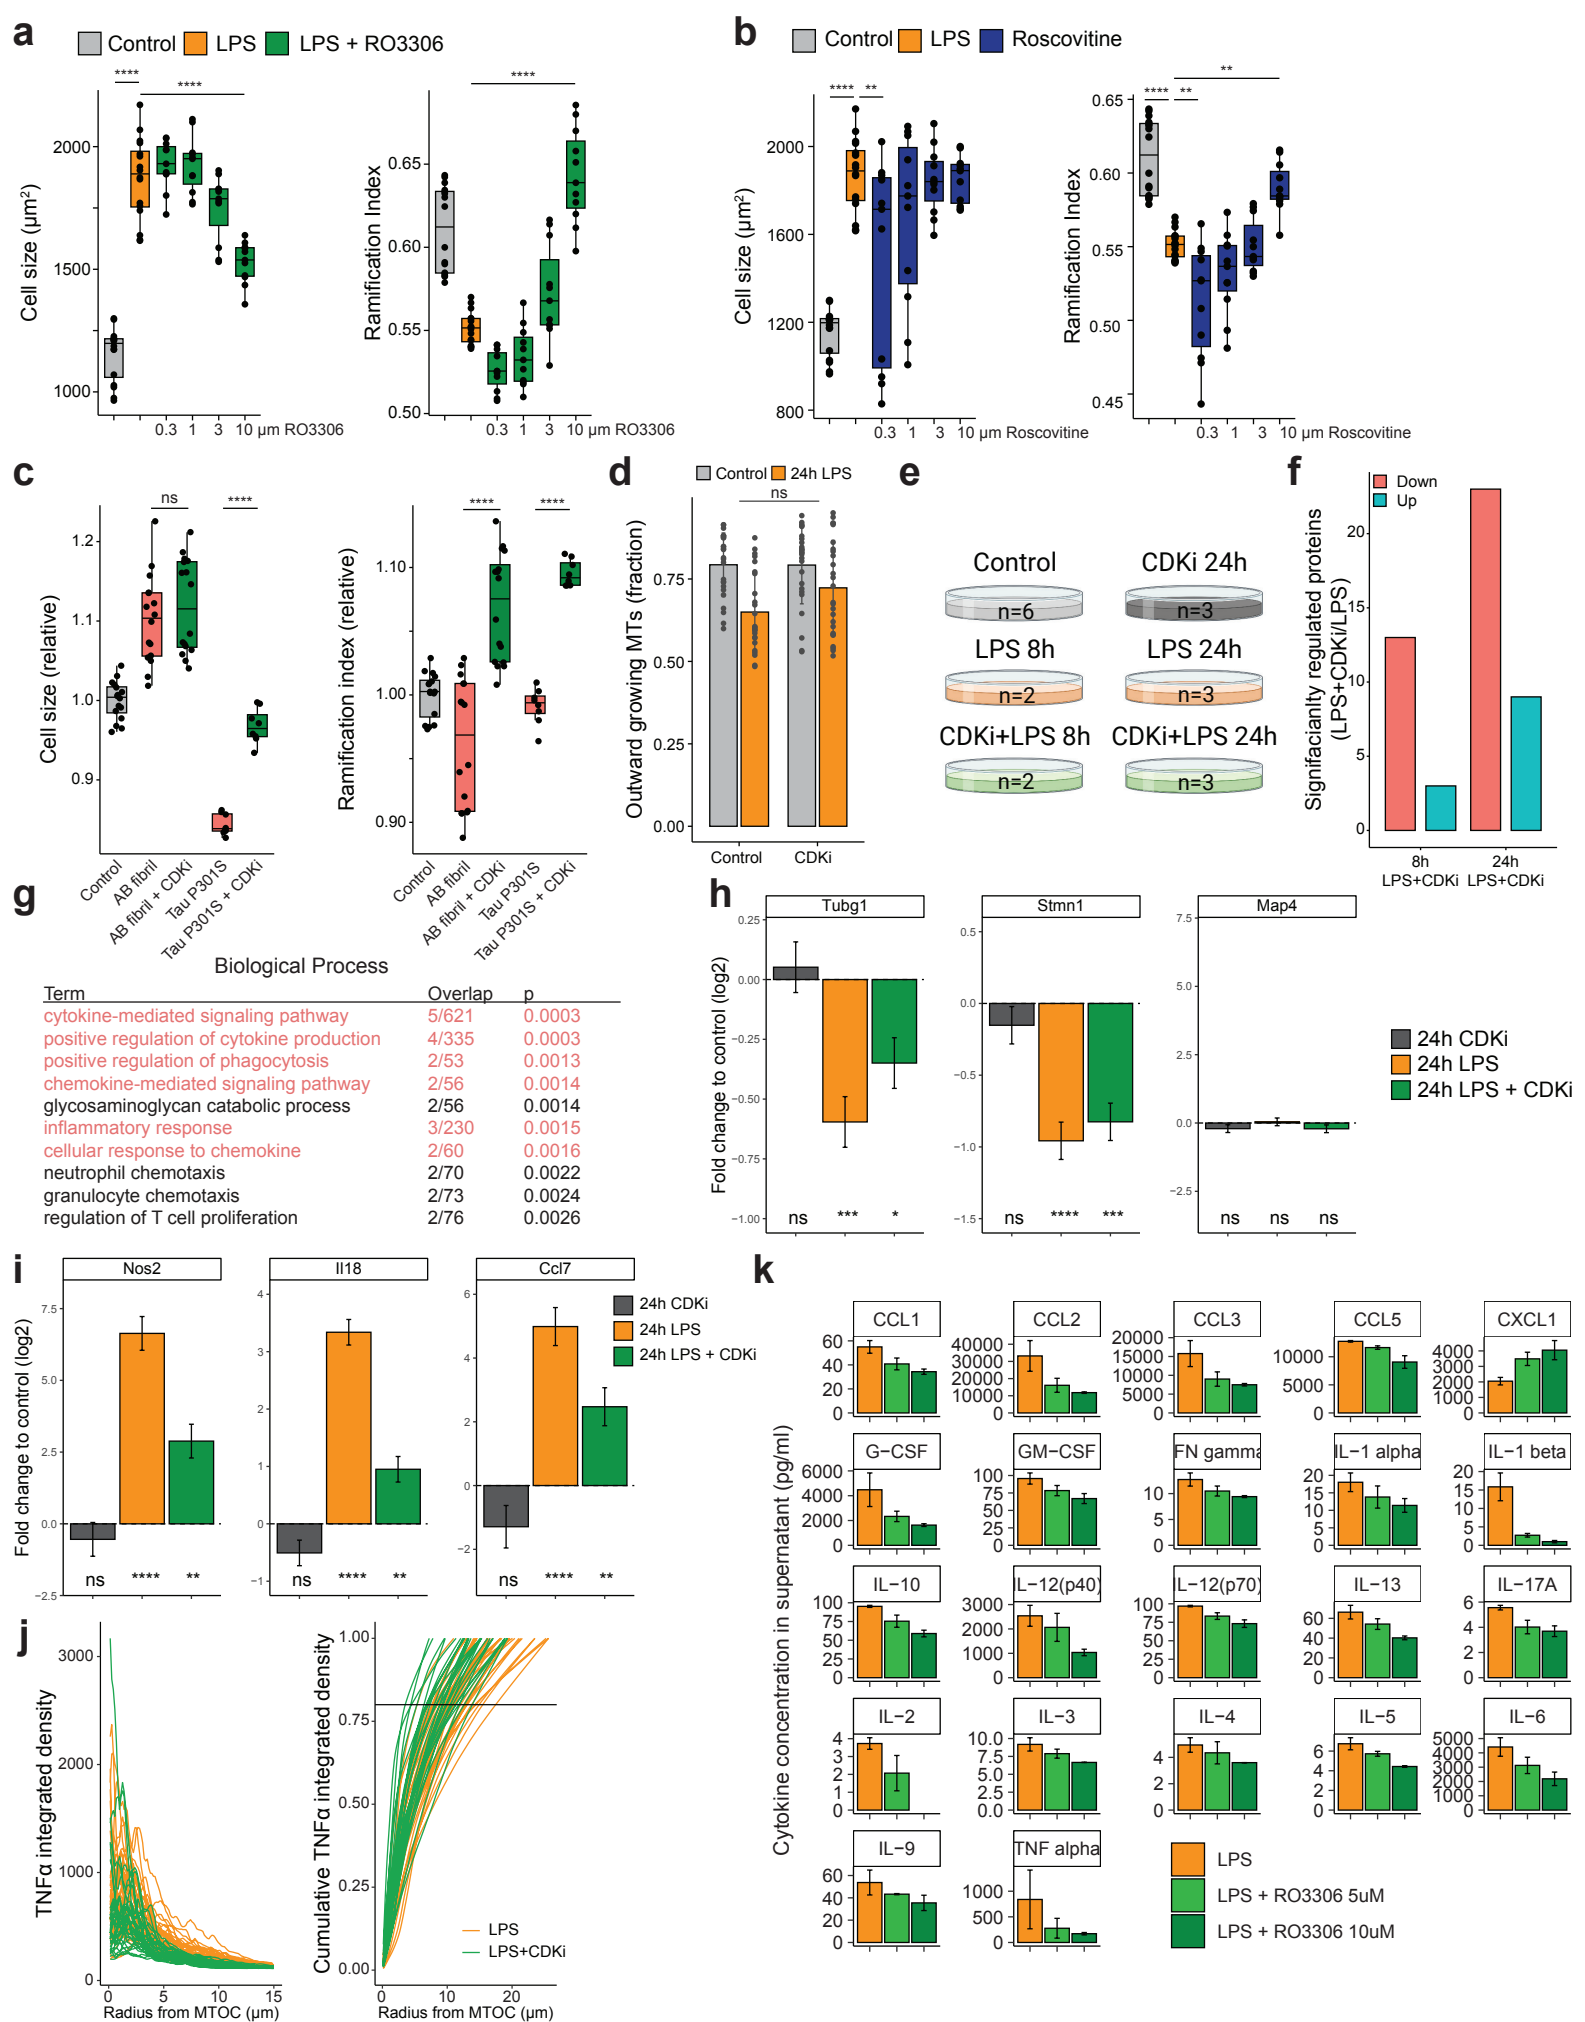

### Supplementary Figure 5 Extended analysis of Cdk1 pathway

- a) Quantification of cell size and ramification index of microglia treated with LPS and increasing doses of RO3306. n = 11-16 wells per condition from 3 independent cultures.
  - b) Quantification of cell size and ramification index of microglia treated with LPS and increasing doses of roscovitine. n = 11-16 wells per condition from 3 independent cultures.
  - c) Quantification of cell size and ramification index of microglia treated with indicated stimulations and RO3306 for 24 h relative to controls. n = 8-16 wells per condition from 4 independent cultures.
  - d) Quantification of MT+TIP growth direction for microglia treated with RO3306 and LPS. n = 25-26 wells per condition from 5 independent cultures.
  - e) Experimental conditions for proteomic analysis: Primary microglia cultures were distributed over the conditions indicated, before lysis, TMT-multiplexing and proteomic analysis.
  - f) Quantification of significantly up- and down-regulated proteins in proteomic analysis of microglia treated with LPS and RO3306 compared to LPS alone. For full table see Supplementary Data 1.
  - g) Gene ontology analysis of biological processes enriched in proteins down-regulated after 8h of LPS and RO3306 treatment compared to LPS alone. Terms associated with inflammation are highlighted in red. For full table see Supplementary Data 2.
  - h) Quantification of the fold change in protein levels of Tubg1, Stmn1 and Map4 in microglia treated with RO3306 alone (grey), LPS alone (yellow) and LPS and RO3306 (green) for 24 h as determined by quantitative mass spectrometry.
  - i) Quantification of the fold change in protein levels of Nos2, IL-18 and Ccl7 in microglia treated with RO3306 alone (grey), LPS alone (yellow) and LPS and RO3306 (green) for 24h as determined by quantitative mass spectrometry.
  - j) Quantification of TNF $\alpha$  immunostaining distribution in primary microglia summarized in Figure 6j. Left: TNF $\alpha$  signal as a function of cell radius centered on the MTOC. Right: Cumulative TNF $\alpha$  signal as a function of cell radius centered on the MTOC. Lines indicate individual cells.
  - k) Quantification of chemokine and cytokine secretion from microglia treated with RO3306 and LPS as indicated into their supernatant for 24 h.
- Bars indicate mean  $\pm$  SD in a, b, c, d, k and mean  $\pm$  SE in h, i. Boxplots show all datapoints, median, 25<sup>th</sup> and 75<sup>th</sup> percentile, whiskers are 1.5\*IQR. Statistical significance was calculated with ANOVA and Tukey HSD in a, b, c, d, h, j. Source data are provided as a Source Data file.
