# Supplementary material for: Polarized microtubule remodeling transforms the morphology of reactive microglia and drives cytokine release
Source: PubMed Central journal article supplement (PMC10562429; doi:10.1038/s41467-023-41891-6), 2023-10-09
Supplement: 41467_2023_41891_MOESM4_ESM.pdf [file 41467_2023_41891_MOESM4_ESM.pdf]

## Description of additional Supplementary files

### Supplementary Movie 1

MT+TIP tracking in primary microglial cells Representative MT+TIP imaging in live primary microglia shown in Fig. 4d. Top panels show control cell and bottom panel shows cell treated with LPS for 24 h prior to imaging. Images were taken at 1 fps for 5 min. Left panels show raw images, middle panels show spot detection of MT+TIPs and right panels show tracks generated in TrackMate that were analyzed in Fig. 4e. Time is shown in mm:ss and scale bars are 10 $\mu$ m.

### Supplementary Movie 2

MT+TIP imaging after nocodazole washout Representative MT+TIP imaging in live primary microglia immediately after nocodazole washout. Images were taken at 1 fps for 5 min. Left panel shows control cells after washout of 1 $\mu$ M nocodazole applied for 1h. Right panel shows cells that were treated with LPS for 16 h before nocodazole washout assay. Time is shown in mm:ss and scale bars are 10 $\mu$ m.

### Supplementary Movie 3

Threedimensional images of microglia in acute brain slices Animation of 3D image stacks shown in Fig. 7b. Panels show representative slices in control (top left), LPS-treated (top right), CDKi-treated (bottom left) and LPS + CDKi-treated (bottom right) slices. Scale bar is 30 $\mu$ m and cell volumes are color coded as indicated between 500 and 5000  $\mu$ m<sup>3</sup>.

### Supplementary Data 1

Quantitative Proteomic Results Table containing fold-change values and statistical analysis of quantitative proteomics and phospho-proteomics shown throughout this study. Comparisons are LPS vs Control, CDKi vs Control and LPS + CDKi vs LPS. To test two-sided null hypothesis of no changes in abundance, the model-based test statistics were compared to the Student t-test distribution with the degrees of freedom appropriate for each protein and each dataset. The resulting P values were adjusted to control the FDR with the method by Benjamini– Hochberg. For raw proteomic data, see Data Availability.

### Supplementary Data 2

Gene Ontology Results Extended Gene Ontology analyses for Fig. 3c, d, h, i and Supplementary Fig. 5g and list of gene names used for highlighting GO terms in volcano plots in Fig. 3e, f, j, k and 6i. P values are derived from Fisher's exact test and adjusted with Benjamini-Hochberg for multiple hypothesis testing.
